# Supplementary material for: Towards Key Principles for the Design and Implementation of Nature Prescription Programs
Source: MDPI journal article supplement (doi:10.3390/su15129530), 2023-06-14
Supplement: s1 [file s1]

## Green Prescribing Interview Study Semi-Structured Interview Questions

### Information and Consent

1. Prior to conducting interviews, the **Information Sheet** should have been distributed and read, and then the **Consent Form** should have been signed and returned to the interviewer.

### A. Introduction

1. **Introduction:** “Hi my name is INTERVIEW NAME from INTERVIEWER INSTITUTION. Thanks for agreeing to participate in this interview on your experience of providing nature-based interventions for health for a research study.”
1. **Key points from Information Sheet:** Remind participant about key points from the Information Sheet:
  - a. **Length:** The interview is expected to last approximately **30 minutes**.
  - b. **Voluntary:** Participation is **voluntary** and you can choose not to answer any question.
  - c. **Audio recording:** Check whether participants are willing for the interview to be **audio recorded** and if yes, then start audio recording.

#### Initial engagement

### B. Use of nature-based interventions

1. **Background of practitioner/practice:** “Please tell me about your professional background (e.g. profession, years in practice, practice setting)?”
2. **Initial involvement:** “Please tell me what you know about using nature-based interventions for health?”
  - a. ‘Do you or your practice utilise nature-based interventions for health? *[If yes, go to section C; if no, go to section E]*
  - b. Do you typically utilise these interventions through formal prescriptions, or less formal recommendations or advice?
3. **Background of patient/client group :** “In terms of the patients that you have prescribed nature-based interventions for health to,
  - a. How did you identify and select potential participants for such interventions?
  - b. What were the main opportunities and needs for prescribing such interventions to this group?

### C. Program experience (*if nature-based interventions are used*)

1. “Please tell me about your experience of prescribing/ using nature-based interventions?”

Prompts, if needed:

  - a. “What worked well for participants/ your practice?”
  - b. “What didn’t work so well for participants/ practice?”
  - c. “What modifications would you recommend if others were to prescribe/utilise nature-based interventions?”
  - d. “Please tell me more about the challenges or barriers to setting up the programs for prescribing/ utilising nature-based interventions?”

- e. “What strategies/tools/factors do you feel may make it easier to prescribe nature-based interventions for health in your practice”

#### **D. Program outcomes**

##### **1. Program effects:**

- a. “What effects, positive or negative (if any), do you think the program had on the client/patient?”

##### **2. Overall worthwhileness:**

- a. “Overall, how **worthwhile** do you think the program was **for your patient/ client**?” Prompt if needed:
  - i. “Do you think it was worth the time and effort?”

##### **3. Program improvements:**

- a. What **improvements** would you recommend for similar programs?

#### **E. Program experience** (*if nature-based interventions are not used*)

For example,

- a. “Please tell me more about the factors or reasons that prevent you from prescribing/ utilising nature-based interventions in your practice?”
- b. “What strategies/tools/factors do you feel may make it easier for you to prescribe nature-based interventions in your practice”

#### **F. Other comments**

- 1. “Do you have any **other observations or comments** you’d like to share about nature-based interventions for health?”

#### **G. Conclusion**

- 1. **Thank-you:** “Thank-you very much for your time today, PARTICIPANT NAME, we appreciate it.”
- 2. **Stop recording**
- 3. **Transcription verification:** Explain that the next step is to **transcribe** (put into written words the content of the interview). Check whether the participant wishes to receive a copy of the transcript in order to verify it. If so, ensure correct email address.
