# Supplementary material for: Towards Key Principles for the Design and Implementation of Nature Prescription Programs
Source: MDPI journal article supplement (doi:10.3390/su15129530), 2023-06-14
Supplement: s1 [file s1]

Archive with 1 entries (1 files):
- sustainability-2257535-supplementary.pdf
